# Supplementary material
Source: publisher figshare collection journal article supplement (https://sage.figshare.com/ndownloader/files/14150378)
Supplement: Supplementary file 1 [file 14150378]

# State Policy Outcomes and State Legislative Approval

## Supplemental appendix

- 2 Equations for the multilevel model specifications
- 3 Figure A1: Predicted Approval of the State Legislature, Very Conservative Respondents
- 3 Figure A2: Predicted Approval of the State Legislature, Very Liberal Respondents
- 4 Table A1: Predicted Probabilities of State Legislative Approval
- 5 Table A2: State Legislative Professionalism, Policy Congruence, and State Legislative Approval
- 7 Table A3: Policy Congruence and State Legislative Approval (Recoded state legislative approval measure, where “Not sure” responses coded as middle category)
- 8 Figure A3: Predicted Approval of State Legislatures, by State Policy Liberalism (Recoded state legislative approval measure, where “Not sure” responses coded as middle category)
- 9 Table A4: Panel Analysis of State Legislative Approval in 2014, Controlling for State Legislative Approval in 2012
- 10 Figure A4: Marginal Effects of State Policy Liberalism on State Legislative Approval in 2014, Controlling for State Legislative Approval in 2012
- 11 Figure A5: Marginal Effects of Changes in State Policy Liberalism on State Legislative Approval in 2014, Controlling for State Legislative Approval in 2012

## Equation for the multilevel model specification

Equation for model in Table 1

$$\begin{aligned}
 & \text{State legislative approval}_{ij} \\
 &= \gamma_{00} + \gamma_{01} \text{StatePolicyLiberalism}_j + \gamma_{10} \text{Ideology}_{ij} \\
 &+ \gamma_{11} \text{StatePolicyLiberalism}_j \text{Ideology}_{ij} + \gamma_{02} \text{OwnPartyStateGov}_j \\
 &+ \gamma_{03} \text{OpposingPartyStateGov}_j + \gamma_{04} \text{LegislativeProfessionalism}_j \\
 &+ \gamma_{05} \text{Unemployment}_j + \gamma_{06} \text{PartyCompetition}_j + \gamma_{20} \text{StatePoliticalKnowledge}_{ij} \\
 &+ \gamma_{30} \text{FollowsPolitics}_{ij} + \gamma_{40} \text{Education}_{ij} + \gamma_{50} \text{CongressionalApproval}_{ij} + \gamma_{60} \text{Age}_{ij} \\
 &+ \gamma_{70} \text{Nonwhite}_{ij} + \gamma_{80} \text{Female}_{ij} + \delta_{0j} + \delta_{1j} \text{Ideology}_{ij}
 \end{aligned}$$

Equation for model in Table 3

$$\begin{aligned}
 & \text{State legislative approval}_{ij} \\
 &= \gamma_{00} + \gamma_{01} \text{StatePolicyLiberalism}_j + \gamma_{10} \text{Ideology}_{ij} + \gamma_{20} \text{StatePoliticalKnowledge}_{ij} \\
 &+ \gamma_{11} \text{StatePolicyLiberalism}_j \text{Ideology}_{ij} \\
 &+ \gamma_{21} \text{StatePolicyLiberalism}_j \text{StatePolitical Knowledge}_{ij} \\
 &+ \gamma_{30} \text{StatePoliticalKnowledge}_{ij} \text{Ideology}_{ij} \\
 &+ \gamma_{31} \text{StatePolicyLiberalism}_j \text{StatePoliticalKnowledge}_{ij} \text{Ideology}_{ij} \\
 &+ \gamma_{02} \text{OwnPartyStateGov}_j + \gamma_{03} \text{OpposingPartyStateGov}_j \\
 &+ \gamma_{04} \text{LegislativeProfessionalism}_j + \gamma_{05} \text{Unemployment}_j + \gamma_{06} \text{PartyCompetition}_j \\
 &+ \gamma_{40} \text{FollowsPolitics}_{ij} + \gamma_{50} \text{Education}_{ij} + \gamma_{60} \text{CongressionalApproval}_{ij} + \gamma_{70} \text{Age}_{ij} \\
 &+ \gamma_{80} \text{Nonwhite}_{ij} + \gamma_{90} \text{Female}_{ij} + \delta_{0j} + \delta_{1j} \text{Ideology}_{ij} + \delta_{2j} \text{StatePoliticalKnowledge}_{ij}
 \end{aligned}$$

Equation for model in Table 4

$$\begin{aligned}
 & \Delta \text{State legislative approval}_{ij} \\
 &= \gamma_{00} + \gamma_{01} \Delta \text{StatePolicyLiberalism}_j + \gamma_{10} \text{Ideology}_{ij} \\
 &+ \gamma_{11} \Delta \text{StatePolicyLiberalism}_j \text{Ideology}_{ij} + \gamma_{02} \Delta \text{OwnPartyStateGov}_j \\
 &+ \gamma_{03} \Delta \text{OpposingPartyStateGov}_j + \gamma_{04} \Delta \text{Unemployment}_j \\
 &+ \gamma_{20} \Delta \text{StatePoliticalKnowledge}_{ij} \\
 &+ \gamma_{30} \Delta \text{FollowsPolitics}_{ij} + \gamma_{40} \Delta \text{CongressionalApproval}_{ij} + \gamma_{50} \text{Education}_{ij} + \gamma_{60} \text{Age}_{ij} \\
 &+ \gamma_{70} \text{Nonwhite}_{ij} + \gamma_{80} \text{Female}_{ij} + \delta_{0j} + \delta_{1j} \text{Ideology}_{ij} + \mu_{ij}
 \end{aligned}$$

**Figure A1: Predicted Approval of the State Legislature, Very Conservative Respondents**

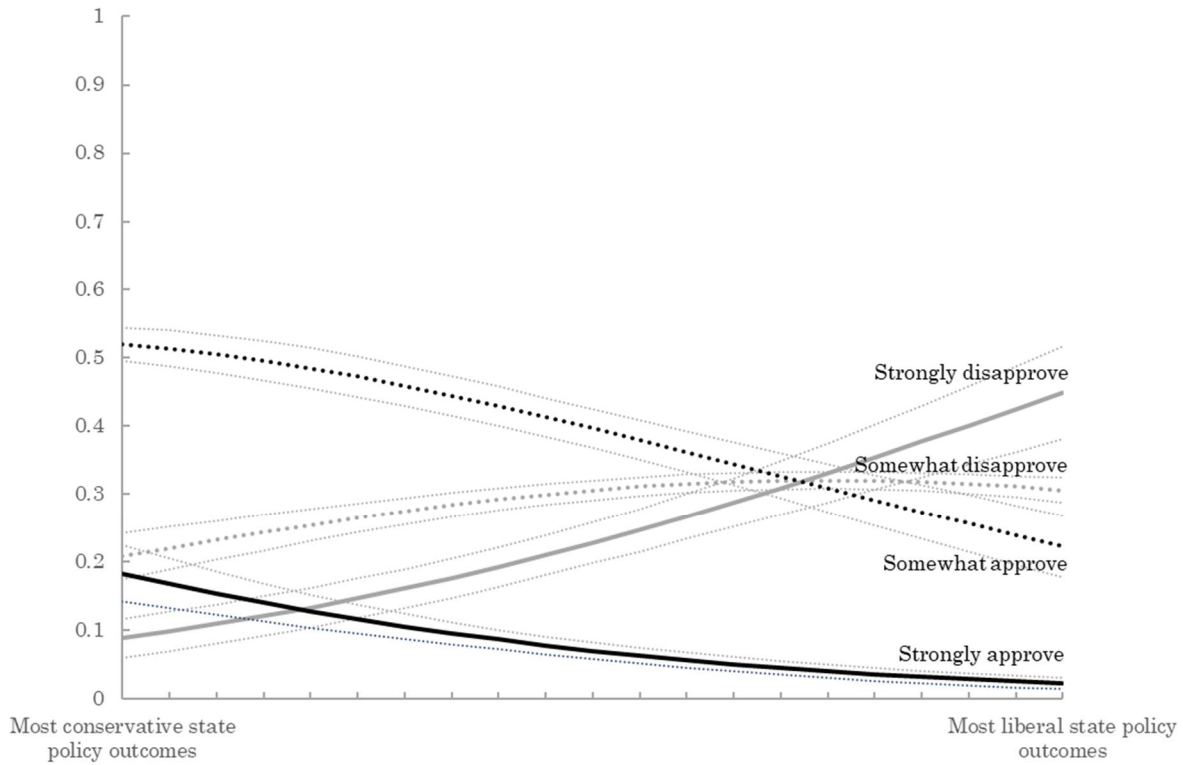

**Figure A2: Predicted Approval of the State Legislature, Very Liberal Respondents**

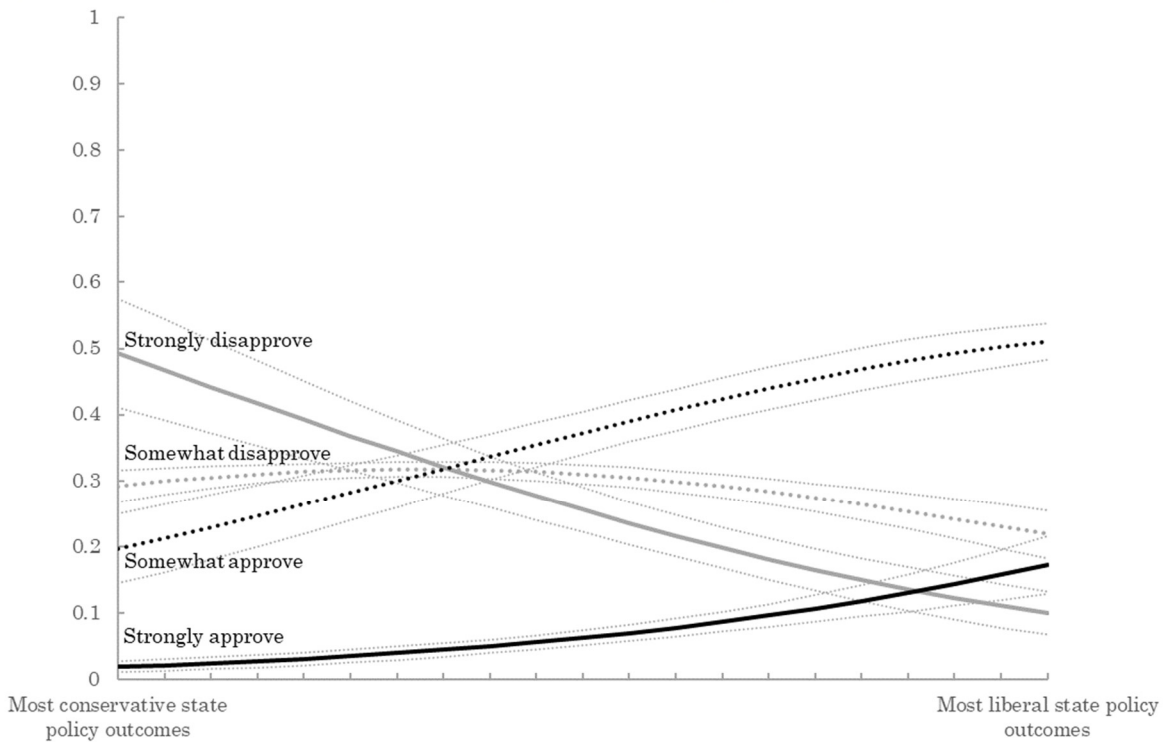

Predicted probabilities are based on estimates reported in Table 1, other variables at their means.

**Table A1: Predicted Probabilities of State Legislative Approval**

|                                            | Pr(Strongly<br>approve) | Pr(Somewhat<br>approve) | Pr(Somewhat<br>disapprove) | Pr(Strongly<br>disapprove) |
|--------------------------------------------|-------------------------|-------------------------|----------------------------|----------------------------|
| Own-party control of state government      | 0.08<br>[0.06, 0.09]    | 0.55<br>[0.52, 0.58]    | 0.28<br>[0.25, 0.31]       | 0.10<br>[0.08, 0.11]       |
| Opposing party control of state government | 0.02<br>[0.02, 0.02]    | 0.26<br>[0.24, 0.29]    | 0.40<br>[0.39, 0.42]       | 0.32<br>[0.28, 0.35]       |
| Divided government                         | 0.03<br>[0.02, 0.03]    | 0.35<br>[0.32, 0.38]    | 0.39<br>[0.38, 0.41]       | 0.23<br>[0.21, 0.26]       |
| Minimum, state unemployment rate           | 0.05<br>[0.03, 0.08]    | 0.49<br>[0.41, 0.57]    | 0.32<br>[0.27, 0.38]       | 0.13<br>[0.08, 0.17]       |
| Maximum, state unemployment rate           | 0.03<br>[0.02, 0.04]    | 0.36<br>[0.30, 0.41]    | 0.39<br>[0.37, 0.41]       | 0.22<br>[0.18, 0.27]       |
| Minimum, state legislative professionalism | 0.05<br>[0.04, 0.06]    | 0.46<br>[0.41, 0.50]    | 0.35<br>[0.32, 0.37]       | 0.15<br>[0.12, 0.18]       |
| Maximum, state legislative professionalism | 0.02<br>[0.01, 0.03]    | 0.30<br>[0.21, 0.40]    | 0.40<br>[0.38, 0.42]       | 0.27<br>[0.18, 0.37]       |
| Minimum, electoral competition             | 0.02<br>[0.01, 0.03]    | 0.30<br>[0.22, 0.38]    | 0.40<br>[0.39, 0.42]       | 0.27<br>[0.20, 0.35]       |
| Maximum, electoral competition             | 0.04<br>[0.04, 0.05]    | 0.45<br>[0.4, 0.49]     | 0.35<br>[0.33, 0.38]       | 0.16<br>[0.13, 0.18]       |
| Minimum, knowledge of state politics       | 0.04<br>[0.03, 0.04]    | 0.42<br>[0.39, 0.45]    | 0.37<br>[0.35, 0.39]       | 0.18<br>[0.16, 0.20]       |
| Maximum, knowledge of state politics       | 0.03<br>[0.03, 0.04]    | 0.39<br>[0.36, 0.42]    | 0.38<br>[0.36, 0.40]       | 0.20<br>[0.18, 0.21]       |
| Minimum, follows politics                  | 0.03<br>[0.02, 0.03]    | 0.35<br>[0.32, 0.39]    | 0.39<br>[0.37, 0.41]       | 0.22<br>[0.20, 0.25]       |
| Maximum, follows politics                  | 0.04<br>[0.03, 0.04]    | 0.42<br>[0.39, 0.45]    | 0.37<br>[0.35, 0.39]       | 0.18<br>[0.16, 0.20]       |
| Minimum, congressional approval            | 0.02<br>[0.01, 0.02]    | 0.26<br>[0.23, 0.28]    | 0.40<br>[0.39, 0.42]       | 0.33<br>[0.29, 0.36]       |
| Maximum, congressional approval            | 0.29<br>[0.25, 0.32]    | 0.61<br>[0.59, 0.62]    | 0.09<br>[0.07, 0.10]       | 0.02<br>[0.02, 0.03]       |
| Less than a high school degree             | 0.04<br>[0.03, 0.04]    | 0.42<br>[0.39, 0.44]    | 0.37<br>[0.35, 0.39]       | 0.18<br>[0.16, 0.20]       |
| Graduate degree                            | 0.03<br>[0.03, 0.04]    | 0.39<br>[0.35, 0.43]    | 0.38<br>[0.36, 0.40]       | 0.20<br>[0.17, 0.22]       |
| Nonwhite                                   | 0.04<br>[0.03, 0.04]    | 0.40<br>[0.37, 0.43]    | 0.38<br>[0.36, 0.40]       | 0.19<br>[0.17, 0.21]       |
| White                                      | 0.04<br>[0.03, 0.04]    | 0.42<br>[0.39, 0.44]    | 0.37<br>[0.35, 0.39]       | 0.18<br>[0.16, 0.19]       |

---

Predicted probabilities based on results in Table 1, holding other variables at their means.

---

**Table A2: State Legislative Professionalism, Policy Congruence, and State Legislative Approval**

|                                                                          | State legislative approval, 2014 |
|--------------------------------------------------------------------------|----------------------------------|
| State policy liberalism                                                  | -0.536*<br>(0.070)               |
| Ideology                                                                 | -0.028<br>(0.029)                |
| State legislative professionalism                                        | -0.101<br>(0.103)                |
| Policy liberalism $\times$ ideology                                      | 0.188*<br>(0.022)                |
| Policy liberalism $\times$ state legislative professionalism             | 0.038<br>(0.045)                 |
| Ideology $\times$ state legislative professionalism                      | -0.022<br>(0.027)                |
| Policy liberalism $\times$ ideology $\times$ legislative professionalism | 0.003<br>(0.013)                 |
| Own party control of state government                                    | 1.058*<br>(0.064)                |
| Opposing party control of state government                               | -0.433*<br>(0.084)               |
| State unemployment rate                                                  | -0.133*<br>(0.061)               |
| History of single party control of state politics                        | -2.561*<br>(0.868)               |
| Follows politics                                                         | 0.302*<br>(0.068)                |
| Knowledge of partisan control of state legislature                       | -0.067*<br>(0.018)               |
| Education                                                                | -0.124*<br>(0.064)               |
| Congressional approval                                                   | 3.163*<br>(0.134)                |
| Age                                                                      | 0.000<br>(0.001)                 |
| Nonwhite                                                                 | 0.094*<br>(0.042)                |
| Female                                                                   | 0.020<br>(0.033)                 |
| Cutpoint 1                                                               | -1.554*<br>(0.402)               |
| Cutpoint 2                                                               | 0.208<br>(0.401)                 |
| Cutpoint 3                                                               | 3.303*<br>(0.398)                |
| <i>Variance components</i>                                               |                                  |
| Variance, intercept                                                      | 0.427*<br>(0.083)                |

|                                                                                                                                |             |
|--------------------------------------------------------------------------------------------------------------------------------|-------------|
| Variance, ideology                                                                                                             | 0.036*      |
|                                                                                                                                | (0.007)     |
| Covariance, intercept and ideology                                                                                             | -0.105*     |
|                                                                                                                                | (0.023)     |
| Deviance                                                                                                                       | 91569       |
| N (number of states)                                                                                                           | 42,442 (48) |
| 2014 Cooperative Congressional Election Study. Multilevel ordered logit<br>estimates. Standard errors in parentheses. * p<0.05 |             |

**Table A3: Policy Congruence and State Legislative Approval**  
**(“Not sure” responses coded as middle category)**

|                                                    | State leg. approval, 2014 |
|----------------------------------------------------|---------------------------|
| State policy liberalism                            | -0.522*<br>(0.059)        |
| Ideology                                           | -0.026<br>(0.027)         |
| Policy liberalism × ideology                       | 0.173*<br>(0.018)         |
| Own party control of state government              | 0.987*<br>(0.063)         |
| Opposing party control of state government         | -0.394*<br>(0.076)        |
| Legislative professionalism                        | -0.070*<br>(0.033)        |
| State unemployment rate                            | -0.137*<br>(0.064)        |
| History of single party control of state politics  | -1.976*<br>(0.804)        |
| Congressional approval                             | 2.938*<br>(0.114)         |
| Follows politics                                   | 0.237*<br>(0.056)         |
| Knowledge of partisan control of state legislature | -0.080*<br>(0.016)        |
| Education                                          | -0.090<br>(0.063)         |
| Age                                                | -0.001<br>(0.001)         |
| Nonwhite                                           | 0.101*<br>(0.041)         |
| Female                                             | 0.016<br>(0.035)          |
| Cutpoint 1                                         | -1.774*<br>(0.414)        |
| Cutpoint 2                                         | -0.194<br>(0.414)         |
| Cutpoint 3                                         | 0.302<br>(0.411)          |
| Cutpoint 4                                         | 3.189*<br>(0.410)         |
| <i>Variance components</i>                         |                           |
| Variance, intercept                                | 0.371*<br>(0.074)         |
| Variance, ideology                                 | 0.033*<br>(0.006)         |
| Covariance, intercept and ideology                 | -0.092*<br>(0.020)        |
| Deviance                                           | 121,116                   |
| N (number of states)                               | 46,784 (48)               |

Cooperative Congressional Election Study, 2014. Those answering “not sure” included as a middle option in the state legislative approval scale. Multilevel ordered logit estimates. Standard errors in parentheses. \* p<0.05

**Figure A3: Predicted Approval of State Legislatures, by State Policy Liberalism**  
 (Recoded state legislative approval measure, where “Not sure” responses coded as middle category)

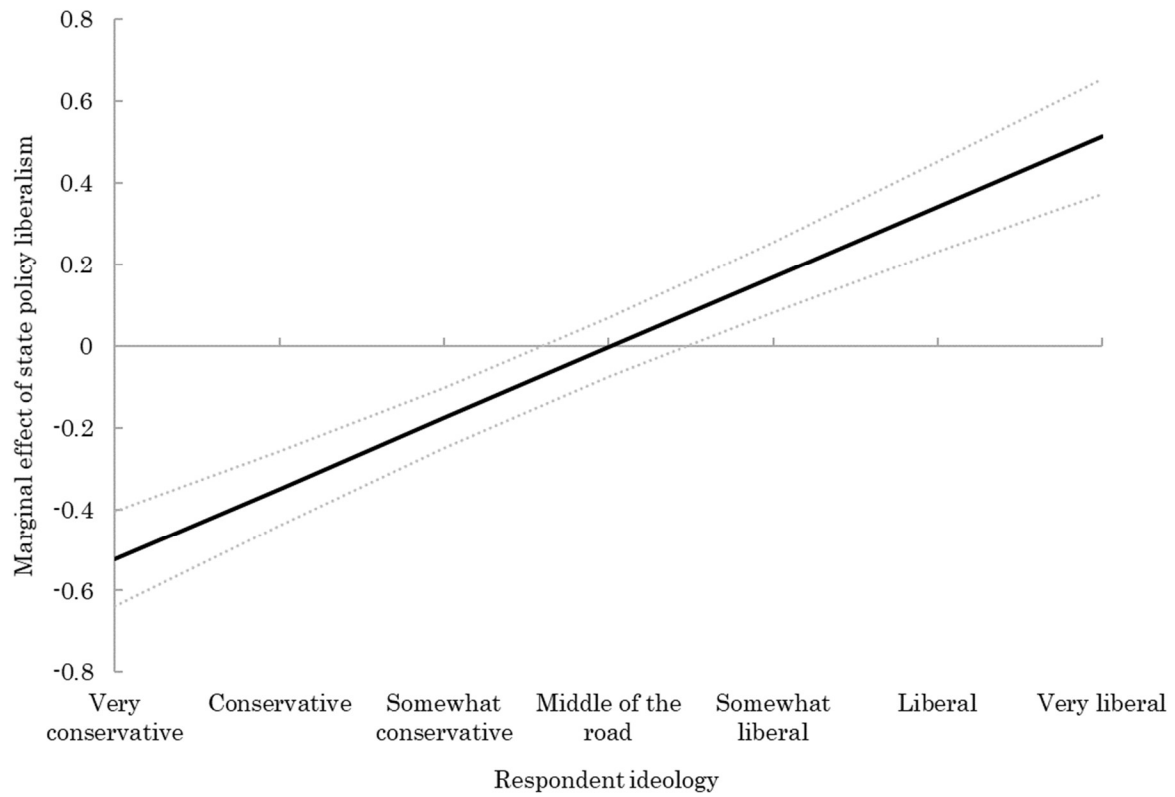

Marginal effects are based on the estimates reported in Table A3.



**Table A4: Panel Analysis of State Legislative Approval in 2014, Controlling for State Legislative Approval in 2012**

|                                                                           | State leg. approval, 2014 |
|---------------------------------------------------------------------------|---------------------------|
| State legislative approval, 2012                                          | 1.661*<br>(0.094)         |
| Ideology                                                                  | 0.031<br>(0.063)          |
| State policy liberalism, 2014                                             | -0.352*<br>(0.115)        |
| Ideology $\times$ State policy liberalism                                 | 0.151*<br>(0.040)         |
| Change in state policy liberalism, 2012 to 2014                           | -1.084*<br>(0.271)        |
| Ideology $\times$ Change in state policy liberalism                       | 0.316*<br>(0.089)         |
| Own party control of state government                                     | 0.818*<br>(0.189)         |
| Opposing party control of state government                                | -0.615*<br>(0.187)        |
| Legislative professionalism                                               | -0.004<br>(0.054)         |
| State unemployment rate                                                   | -0.178*<br>(0.078)        |
| History of single party control of state politics                         | -2.681*<br>(0.900)        |
| Congressional approval                                                    | 2.071*<br>(0.244)         |
| Follows politics                                                          | 0.288<br>(0.217)          |
| Knowledge of partisan control of state legislature                        | 0.169*<br>(0.064)         |
| Education                                                                 | 0.174<br>(0.191)          |
| Age                                                                       | 0.005<br>(0.004)          |
| Nonwhite                                                                  | 0.062<br>(0.149)          |
| Female                                                                    | 0.197*<br>(0.101)         |
| Cutpoint 1                                                                | 0.482<br>(0.527)          |
| Cutpoint 2                                                                | 2.820*<br>(0.523)         |
| Cutpoint 3                                                                | 6.812*<br>(0.519)         |
| <i>Variance components</i>                                                |                           |
| Variance, intercept                                                       | 1.197*<br>(0.329)         |
| Variance, ideology                                                        | 0.152*<br>(0.043)         |
| Covariance, intercept and ideology                                        | -0.396*<br>(0.113)        |
| Deviance                                                                  | 10,948                    |
| N (number of states)                                                      | 7791 (49)                 |
| Multilevel regression estimates, standard errors in parentheses. * p<0.05 |                           |

**Figure A4: Marginal Effects of State Policy Liberalism on State Legislative Approval in 2014, Controlling for State Legislative Approval in 2012**

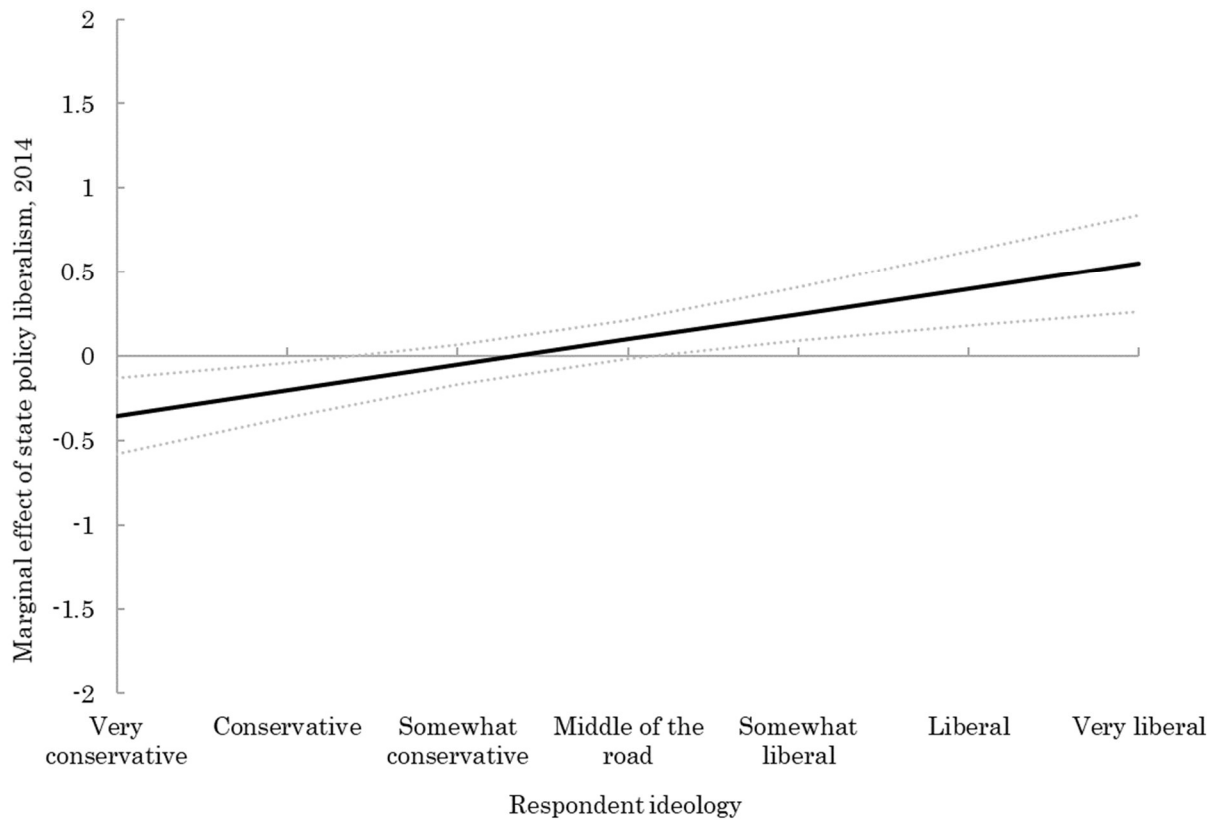

The marginal effects are based on estimates reported in Table A4.

**Figure A5: Marginal Effects of Changes in State Policy Liberalism on State Legislative Approval in 2014, Controlling for State Legislative Approval in 2012**

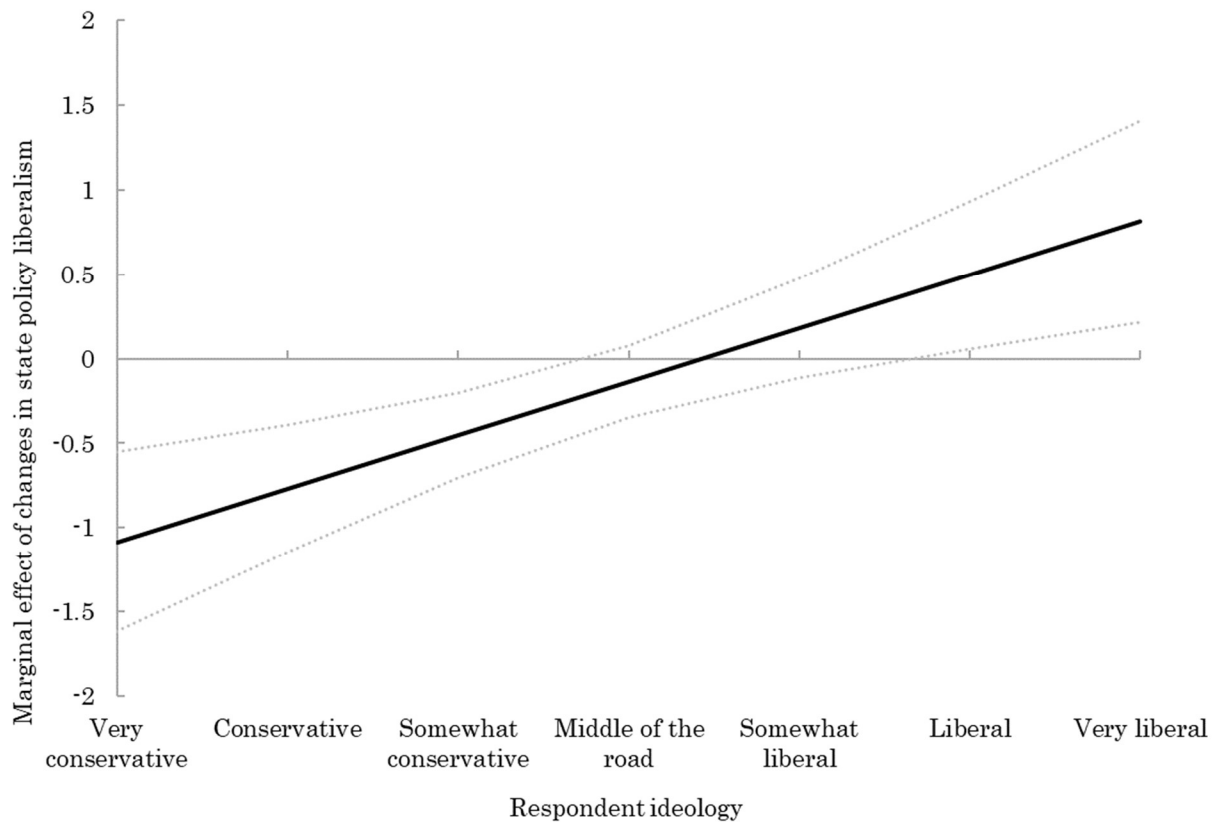

The marginal effects are based on estimates reported in Table A4.
